# Supplementary material for: Prevalence and health outcomes of domestic violence amongst clinical populations in Arab countries: a systematic review and meta-analysis
Source: PubMed Central journal article supplement (PMC6421940; doi:10.1186/s12889-019-6619-2), 2019-03-18
Supplement: 12889_2019_6619_MOESM2_ESM.pdf [file 12889_2019_6619_MOESM2_ESM.pdf]

Additional file 2

| Author (year)                               | Country      | Setting                                                | Design       | Recruitment                                                    | Response | Sample size | Survey type | Tool used for violence prevalence                    | Timescale              | IPV or DV   | Any violence prevalence +definition   | Physical violence prevalence | Sexual violence prevalence | Emotional/ Psychological violence prevalence + definition | Control or Economic                    | Health impacts          | AXIS quality |
|---------------------------------------------|--------------|--------------------------------------------------------|--------------|----------------------------------------------------------------|----------|-------------|-------------|------------------------------------------------------|------------------------|-------------|---------------------------------------|------------------------------|----------------------------|-----------------------------------------------------------|----------------------------------------|-------------------------|--------------|
| Abdelmegeid (2004) <sup>22</sup>            | Egypt        | MCHC centres 4 districts Cairo                         | CS           | Clinics: R<br>Women: CON                                       | -        | 1000        | I           | No – 12Qs violence behaviours                        | Lifetime               | IPV         | 61%<br>P or S or E                    | 36.9%                        | 4.3%                       | 14.7%<br>'Psychological'                                  | -                                      | -                       | Medium       |
| Abdelhai and Mosleh (2005) <sup>23</sup>    | Egypt        | ANC at teaching hospital, Cairo                        | CS           | Women: R                                                       | 96%      | 376         | I           | HITS                                                 | Lifetime               | IPV         | 30.6%<br>P or E                       | 7.7%                         | -                          | 17%<br>'Screamed or cursed frequently'                    | -                                      | MH                      | Medium/High  |
| Abujilban et al (2015) <sup>24</sup>        | Jordan       | Postnatal department, MOH hospital                     | Case control | Hospitals: cluster random<br>Cases: consecutive<br>Controls: R | -        | 158         | Q           | WHO (physical)                                       | Pregnancy              | IPV         | -                                     | -                            | -                          | -                                                         | -                                      | Reprod                  | Medium       |
| Afifi et al (2011) <sup>25</sup>            | Saudi Arabia | 10 PHC clinics – 6 urban, 3 village, 1 Hejar           | CS           | Clinic: 2 stage proportionate cluster R<br>Women:CON           | -        | 2000        | I           | WHO (modified)                                       | Past month<br>Lifetime | DV          | 1m: 32.7%<br>LT: 39.3%<br>P or S or E | 1m: 22.8%<br>LT: 17.9%       | 1m: 11.8%<br>LT: 6.9%      | 1m: 29.1%<br>LT: 35.9%<br>'Mental'                        | -                                      | MH<br>Reprod<br>General | Medium       |
| Ahmed and Elmari (2005) <sup>26</sup>       | Sudan        | Medical clinics – referrals from primary care          | CS           | Women: CON                                                     | 87%      | 394         | Q           | No – 17Qs (based on Bradley et al 2002) no sexual Qs | 12m                    | IPV<br>[DV] | 41.6%<br>P or E                       | 20.1%                        | -                          | 30.2%<br>'Threat'                                         | 28.4%<br>'Control'                     | -                       | Medium/High  |
| Al Modallal (2012) <sup>27</sup><br>†       | Jordan       | UNWRA health centres for Palestinian refugees 3 cities | CS           | Women: CON                                                     | -        | 300         | Q           | AAS                                                  | 12m                    | IPV         | 43.4%<br>P or S or E                  | -                            | -                          | -                                                         | -                                      | MH*                     | Medium       |
| Al Modallal et al (2014) <sup>28</sup><br>† | Jordan       | MOH and UNWRA health centres, 3 cities                 | CS           | Women: CON                                                     | -        | 620         | Q           | AAS                                                  | 12m                    | IPV         | 37.5% *<br>P or S or E                | -                            | -                          | -                                                         | -                                      | N/A                     | Medium       |
| Al Modallal et al (2015) <sup>29</sup><br>† | Jordan       | UNWRA health centres for Palestinian refugees          | CS           | Women: CON                                                     | -        | 300         | Q           | AAS: P + S<br>WHO: control<br>Other: E and Econ      | Lifetime               | IPV         | 78% *<br>P or S or E or Econ          | 22.7%                        | 16.7%                      | 50.3% *<br>'Emotional'                                    | 736%<br>'Control'<br>50.3% *<br>'Econ' | -                       | Medium       |
| Al Modallal (2016) <sup>30</sup><br>†       | Jordan       | UNWRA health centres for Palestinian refugees 3 cities | CS           | Women: CON                                                     | 72%      | 238         | Q           | AAS                                                  | 12m                    | IPV         | N/A                                   | N/A                          | N/A                        | N/A                                                       | N/A                                    | General*                | Medium/High  |

Additional file 2

|                                                          |              |                                                  |    |                                     |     |     |   |                                           |                       |     |                                     |                         |                      |                                                 |                               |                         |                 |
|----------------------------------------------------------|--------------|--------------------------------------------------|----|-------------------------------------|-----|-----|---|-------------------------------------------|-----------------------|-----|-------------------------------------|-------------------------|----------------------|-------------------------------------------------|-------------------------------|-------------------------|-----------------|
| Al Modallal (2017) <sup>31</sup><br>†                    | Jordan       | MOH and UNWRA health centres, 3 cities           | CS | Women: CON                          | -   | 709 | Q | WHO (adapted)                             | Lifetime              | IPV | -                                   | 51.5% *                 | 24.5% *              | -                                               | 68.8% *                       | -                       | Medium          |
| Al-Nsour et al (2009) <sup>32</sup>                      | Jordan       | PHC – 9 centres in Balka governate               | CS | Clinic: R<br>Women: CON             | 98% | 356 | Q | No – single open ended question           | 12m                   | IPV | 87%<br>P or E                       | 19.6%                   | -                    | 47.5%<br>'Emotional'<br>[12.3%<br>'neglect']    | -                             | -                       | Medium/<br>High |
| Al-Serkal et al (2014) <sup>33</sup>                     | UAE          | Primary healthcare centre in Dubai               | CS | Women: R                            | -   | 700 | I | WHO                                       | 12m<br>Lifetime       | IPV | -                                   | 12m: 7.1%<br>LT: 31%    | 12m: 3.7%<br>LT: 22% | 12m: 7.5%<br>LT: 40.9%                          | -                             | MH<br>Reprod<br>General | Medium          |
| Al Shdayfat (2017a) <sup>34</sup><br>‡                   | Jordan       | MCHC – 3 urban, 2 rural. Syrian refugees.        | CS | Clinics:<br>purposive<br>Women: CON | 73% | 182 | Q | NORAQ (Arabic)                            | 12m<br>Lifetime       | DV  | -                                   | -                       | -                    | 12m: 44.5%<br>LT: 51.6%                         | -                             | MH*                     | Medium/<br>High |
| Al Shdayfat (2017b) <sup>35</sup><br>‡                   | Jordan       | MCHC – 3 urban, 2 rural. Syrian refugees.        | CS | Clinics:<br>purposive<br>Women: CON | 73% | 182 | Q | NORAQ (Arabic)                            | 12m<br>Lifetime       | DV  | -                                   | 12m:14.8%<br>LT: 31.3%* | -                    | -                                               | -                             | MH                      | Medium          |
| Alzahrani et al (2016) <sup>36</sup>                     | Saudi Arabia | Primary Healthcare Centres, Taif                 | CS | 2 stage probability sampling        | 99% | 497 | Q | HITS                                      | 12m                   | IPV | 11.9%<br>P or E                     | -                       | -                    | -                                               | -                             | -                       | Medium          |
| Anes Jellali et al (2014) <sup>37</sup><br>§             | Tunisia      | Family planning centre, Monastir                 | CS | Women: R                            | -   | 197 | I | WAST + econ Q                             | Lifetime              | IPV | 56.9% *<br>P or S or E or Econ      | 32% *                   | 10.6% *              | 56.9% *<br>'Psychological'                      | 41.1% *<br>'Economic'         | MH*<br>Reprod*          | Medium          |
| Anes Jellali et al (2015) <sup>38</sup><br>[FRENCH]<br>§ | Tunisia      | Family planning centre, Monastir                 | CS | Women: R                            | -   | 197 | I | WAST + econ Q                             | Lifetime              | IPV | 56.9%<br>P or S or E or Econ        | 32%                     | 10.6%                | 56.9%<br>'Psychological'                        | 41.1%<br>'Economic'           | Reprod                  | Medium          |
| Awwad et al (2014) <sup>39</sup>                         | Lebanon      | Outpatient gynae clinic, University Hospital     | CS | Women: CON                          | 91% | 91  | I | No – 11Qs appropriate questions           | Lifetime              | IPV | -                                   | 40.6%                   | 33%                  | 64.8%'Verbal'*<br>[19% Emotional<br>22% Social] | 33%<br>'Economic'             | -                       | Medium/<br>High |
| Azm et al (2009) <sup>40</sup>                           | Saudi Arabia | Antenatal, IP ante/postnatal, Emergency O+G, CHC | CS | Women: CON                          | 88% | 350 | I | No – 32Qs questionnaire designed          | Lifetime<br>Pregnancy | IPV | LT: 78%<br>-<br>P or S or E or Econ | LT: 78%<br>PG: 54%      | LT: 48.3%<br>-       | LT: 72.9%<br>-<br>'Psychological'               | LT: 32.6%<br>-<br>'Financial' | MH<br>Reprod            | Medium          |
| Bakr and Ismail (2005) <sup>41</sup>                     | Egypt        | University hospital - varied outpatient clinics  | CS | Women: CON                          | -   | 509 | I | No – 21Qs (Bradley et al 2002 modified)   | Lifetime              | IPV | 89.8%<br>P or S or E                | N/A                     | 17.1%                | 47.9%<br>'Threat'                               | 88.4%<br>'Control'            | General                 | Medium          |
| Barnawi (2017) <sup>42</sup>                             | Saudi Arabia | Primary health care centre, Riyadh               | CS | Women: CON                          | 95% | 720 | Q | No – 14 behaviours questionnaire designed | 12m                   | DV  | 20%<br>P or S or E                  | 4%                      | 2.1%                 | 13.9%<br>'Emotional'<br>(6.8% social)           | 5.3%<br>'Economic'            | General                 | Medium/<br>High |

Additional file 2

|                                               |                     |                                                          |    |                                                       |     |     |   |                                                                   |                                                       |             |                                      |                                          |                          |                           |         |               |                 |
|-----------------------------------------------|---------------------|----------------------------------------------------------|----|-------------------------------------------------------|-----|-----|---|-------------------------------------------------------------------|-------------------------------------------------------|-------------|--------------------------------------|------------------------------------------|--------------------------|---------------------------|---------|---------------|-----------------|
|                                               |                     |                                                          |    |                                                       |     |     |   | from literature                                                   |                                                       |             |                                      |                                          |                          |                           |         |               |                 |
| Boufettal et al (2012) <sup>43</sup> [FRENCH] | Morocco             | University hospital – ANC and inpatient                  | CS | Not stated – convenience?                             | 89% | 867 | I | No – 9 violence behaviours listed                                 | Pregnancy                                             | IPV         | 12.3%<br>P or S                      | -                                        | 1.2%                     | -                         | -       | MH<br>Reprod  | Medium          |
| Clark et al (2008) <sup>44</sup> †            | Jordan              | Family planning, 7 clinics                               | CS | Systematic prob proportionate to size                 | 70% | 353 | Q | WHO (modified)                                                    | Lifetime                                              | IPV         | -                                    | 31%                                      | 20%                      | -                         | -       | Reprod        | Medium/<br>High |
| Clark et al (2009a) <sup>45</sup> †           | Jordan              | Family planning, 7 clinics                               | CS | Systematic prob proportionate to size                 | 70% | 517 | Q | WHO (modified)                                                    | Lifetime                                              | IPV         | -                                    | 31.2% *                                  | 18.8% *                  | 73.4% *                   | 97.2% * | -             | Medium/<br>High |
| Clark et al (2009b) <sup>46</sup> †           | Jordan              | Family planning, 7 clinics                               | CS | Systematic prob proportionate to size                 | 55% | 390 | Q | WHO (modified)                                                    | Pregnancy                                             | DV          | -                                    | 15.4% *                                  | -                        | -                         | -       | -             | Medium          |
| Clark et al (2010) <sup>47</sup> †            | Jordan              | Family planning, 7 clinics                               | CS | Systematic prob proportionate to size                 | 70% | 418 | Q | WHO (modified)                                                    | Lifetime                                              | IPV<br>[DV] | 38% *<br>P or S                      | 29%                                      | 18%                      | -                         | -       | -             | Medium/<br>High |
| Daoud et al (2017) <sup>48</sup>              | Israel (Arabs only) | Maternal and child health clinics- 21 in Arab localities | CS | Clinic: stratified proportional cluster<br>Women: CON | 76% | 436 | I | US Preventative Services Task Force Family screening tool for IPV | Lifetime                                              | IPV         | 66.7%<br>P or S or E or Econ         | 10.6%                                    | -                        | 49.7%                     | -       | -             | High            |
| Eldoseri et al (2014) <sup>49</sup> †         | Saudi Arabia        | Primary healthcare, 6 clinics.                           | CS | Clinic: purposive<br>Women: CON                       | 94% | 200 | I | WHO (modified) physical only                                      | 12m<br>Lifetime                                       | IPV         | -                                    | 12m: 16%<br>LT: 44.5%                    | -                        | -                         | -       | MH<br>General | Medium/<br>High |
| Eldoseri and Sharps (2017) <sup>50</sup> †    | Saudi Arabia        | Primary healthcare, 6 clinics.                           | CS | Clinic: purposive<br>Women: CON                       | 94% | 200 | I | WHO (modified) physical only                                      | 12m<br>Lifetime                                       | IPV         | -                                    | 12m: 16%*<br>LT: 44.5%*                  | -                        | -                         | -       | -             | High            |
| Haddad et al (2011) <sup>51</sup>             | Jordan              | Maternal and child healthcare centres – urban and rural  | CS | Women: CON                                            | 98% | 175 | Q | NORAQ (Arabic – validated by this study)                          | Lifetime                                              | DV          | -                                    | 30%                                      | 6%                       | 39%                       | -       | MH            | Medium/<br>High |
| Hammoury and Khawaja (2007) <sup>52</sup> ††  | Lebanon             | ANC in UNWRA clinic – refugees from Palestine            | CS | Women: CON                                            | 99% | 349 | I | AAS (sexual abuse Q modified)                                     | 12m<br>Lifetime<br>Pregnancy<br>(pregnant women only) | DV          | -<br>LT: 68.8%<br>-<br>P or S or E * | 12m:19.2%<br>LT: 59.3%<br>PG: 11.5%<br>* | 12m:26.4%<br>-<br>-<br>* | 12m: 16.1%<br>-<br>-<br>* | -       | -             | Medium          |
| Hammoury et al (2009) <sup>53</sup>           | Lebanon             | ANC in UNWRA clinic – refugees from                      | CS | Women: CON                                            | 99% | 349 | I | AAS (sexual abuse Q                                               | 12m<br>Lifetime<br>Pregnancy                          | DV          | -<br>LT: 59%<br>-                    | 12m:19.2%<br>-<br>PG: 11.5%              | -                        | -                         | -       | Reprod*       | Medium/<br>High |

Additional file 2

|                                                 |                    |                                                                          |                    |                                 |     |      |   |                                                  |                                               |             |                            |                                  |                           |                                          |                         |              |             |
|-------------------------------------------------|--------------------|--------------------------------------------------------------------------|--------------------|---------------------------------|-----|------|---|--------------------------------------------------|-----------------------------------------------|-------------|----------------------------|----------------------------------|---------------------------|------------------------------------------|-------------------------|--------------|-------------|
| ††                                              |                    | Palestine                                                                |                    |                                 |     |      |   | modified)                                        | (pregnant women only)                         |             | P or E                     |                                  |                           |                                          |                         |              |             |
| Ibrahim et al (2015) <sup>54</sup>              | Egypt              | Obstetric outpatient unit – university hospital                          | Prospective cohort | Women: CON                      | 85% | 1857 | I | NORAQ (Arabic)                                   | Pregnancy                                     | IPV         | 44.1%<br>P or S or E       | 15.9%                            | 10%                       | 32.6%<br>'Emotional'                     | -                       | Reprod       | Medium/High |
| Khawaja and Hammoury (2008) <sup>55</sup><br>†† | Lebanon            | ANC in UNWRA clinic – refugees from Palestine                            | CS                 | Women: CON                      | 99% | 349  | I | AAS (sexual abuse Q modified)                    | 12m Pregnancy<br>(pregnant women only)        | IPV         | -                          | 12m:19.2%<br>PG: 11.4%           | 12m: 26.4%<br>-           | 12m: 16.1%<br>-                          | -                       | Reprod       | Medium      |
| Malik et al (2017) <sup>56</sup>                | Iraq               | Public primary healthcare centre – for reproductive problems             | CS                 | Women: R                        | 82% | 82   | I | WHO (adapted)                                    | 12m                                           | IPV         | 72%<br>P or S or E         | 39%                              | 18.3%                     | 61%<br>'Emotional'                       | -                       | -            | Medium      |
| Mamdouh et al (2012) <sup>57</sup>              | Egypt              | Family health centres – 12 centres, urban and rural                      | CS                 | Clinics: R<br>Women: systematic | 93% | 3271 | I | No 26Qs (designed questionnaire from literature) | Lifetime                                      | IPV         | 77%<br>P or S or E or Econ | 50.2%                            | 37.1%                     | 71%<br>'Emotional'                       | 40.8%<br>'Economic'     | -            | High        |
| Okour and Badarneh (2011) <sup>58</sup>         | Jordan             | Antenatal – MCH clinics 2 rural, 2 urban. Bedouin community.             | CS                 | ? sampling                      | 97% | 303  | I | WHO                                              | Pregnancy                                     | IPV         | 40.9%<br>P or S or E       | 34.6%                            | 15.5%                     | 28.1%<br>'Psychological'                 | -                       | -            | Medium/High |
| Oweis et al (2010) <sup>59</sup>                | Jordan             | Maternal and Child Health Centres, 5 in Irbid City.                      | CS                 | Women: CON                      | 83% | 316  | Q | No (5 Y/N questions)                             | Pregnancy                                     | IPV<br>[DV] | -                          | 10.4%                            | 5.7%                      | 23.7%<br>'Verbal'<br>(‘Emotional’ 23.4%) | -                       | MH<br>Reprod | Medium/High |
| Spencer et al (2015) <sup>60</sup>              | Jordan and Lebanon | Primary care clinics–Syrian national and Palestinian refugees from Syria | CS                 | Women: CON                      | -   | 385  | I | No – survey developed and tested by researchers  | Since arriving in Jordan/ Lebanon + pregnancy | DV          | -<br>-<br>-                | Jor: 7.5%<br>Leb: 6%<br>PG: 6.3% | Jor: 1.5%<br>Leb: 0%<br>- | Jor: 6%<br>Leb: 6.5%<br>-                | Jor: 0%<br>Leb: 0%<br>- | Reprod       | Medium      |
| Tashkandi and Rasheed                           | Saudi Arabia       | Primary care – 16 clinics Medina City                                    | CS                 | Clinics: simple R<br>Women: CON | 68% | 689  | I | CTS-R (CTS-revised +                             | 12m Lifetime                                  | IPV         | 12m:58.5%<br>LT:57.8%      | 12m:25.7%<br>LT: 26.9%           | -                         | 12m: 57.5%<br>-                          | -                       | -            | Medium/High |

Additional file 2

|                                                                           |                                                                                                                                             |                                                                                                                                |    |            |              |                                            |              |                                                                                                                                                                           |          |                                  |                                                            |                               |                             |                                                     |                                                                 |                                                                      |        |
|---------------------------------------------------------------------------|---------------------------------------------------------------------------------------------------------------------------------------------|--------------------------------------------------------------------------------------------------------------------------------|----|------------|--------------|--------------------------------------------|--------------|---------------------------------------------------------------------------------------------------------------------------------------------------------------------------|----------|----------------------------------|------------------------------------------------------------|-------------------------------|-----------------------------|-----------------------------------------------------|-----------------------------------------------------------------|----------------------------------------------------------------------|--------|
| (2009) <sup>61</sup>                                                      |                                                                                                                                             |                                                                                                                                |    |            |              |                                            |              | added Qs)                                                                                                                                                                 |          |                                  | P or E                                                     |                               |                             | 'Emotional'                                         |                                                                 |                                                                      |        |
| Usta et al (2007) <sup>62</sup>                                           | Lebanon                                                                                                                                     | Primary care clinics, 4 clinics                                                                                                | CS | Women: CON | 90% estimate | 1415                                       | I            | No 4Qs (based on Haj-Yahia and adapted)                                                                                                                                   | Lifetime | DV                               | 35%<br><br>P or E or Econ                                  | 23%                           | -                           | 32%<br><br>'Insults and threats'                    | 12%<br><br>'Economic'                                           | MH<br>Reprod<br>General                                              | Medium |
| <b>Summary of study design and details = Total 29 studies (41 papers)</b> | Egypt 5<br>Iraq 1<br>Israel (Arabs) 1<br>Jordan 8<br>Lebanon 3<br>Jor+Leb 1<br>Morocco 1<br>Saudi Arabia 6<br>Sudan 1<br>Tunisia 1<br>UAE 1 | Community 21<br>Hospital 7<br>Both 1<br><br>Women's health setting 16<br>General health setting 13<br><br>Refugee population 4 |    |            |              | Sample size:<br><br>min 82<br><br>max 3271 | I:19<br>Q:10 | Validated tool: 17<br><i>WHO 7</i><br><i>NORAQ 3</i><br><i>AAS 2</i><br><i>HITS 2</i><br><i>WAST 1</i><br><i>CTS-R 1</i><br><i>USPSTF 1</i><br><br>Non-validated tool: 12 |          | IPV 19<br><br>DV 6<br><br>Both 4 | Any violence: 21 studies<br><br>P+S+E 13<br>P+S 2<br>P+E 6 | Physical violence: 25 studies | Sexual violence: 19 studies | Emotional and/or psychological violence: 25 studies | Control violence: 4 studies<br><br>Economic violence: 8 studies | Health outcome: 19 studies<br><br>MH: 12<br>Reprod: 12<br>General: 7 |        |

Key: CS = cross sectional, R = random, CON = convenience, I= interview, Q=questionnaire, 12m= 12 months, PG=Pregnancy, LT= lifetime, IPV = intimate partner violence, DV = domestic violence, [DV] = paper also looked at DV but main results presented are for IPV, P = physical, S = sexual, E = emotional/psychological, Econ=economic, Jor= Jordan, Leb=Lebanon, MH= mental health, Reprod= reproductive health, General = general medical or health, N/A= data not appropriate/not used

\* prevalence numbers taken from this paper if multiple papers from same study

† multiple papers from same study

‡ multiple papers from same study

§ multiple papers from same study

¶ multiple papers from same study

| multiple papers from same study

†† multiple papers from same study
