# Supplementary material for: Prevalence and health outcomes of domestic violence amongst clinical populations in Arab countries: a systematic review and meta-analysis
Source: PubMed Central journal article supplement (PMC6421940; doi:10.1186/s12889-019-6619-2), 2019-03-18
Supplement: 12889_2019_6619_MOESM3_ESM.pdf [file 12889_2019_6619_MOESM3_ESM.pdf]

### Appendix 3: Perpetrators of domestic violence

| Paper                                 | Violence type                           | Husband                   | Husband + other           | Any family non-husband | Brother | Mother                    | Father             | Mother-in-law                        | Father-in-law        | Other                                                   | Comments                                                                                 |
|---------------------------------------|-----------------------------------------|---------------------------|---------------------------|------------------------|---------|---------------------------|--------------------|--------------------------------------|----------------------|---------------------------------------------------------|------------------------------------------------------------------------------------------|
| Afifi et al (2011) <sup>25</sup>      | Physical                                | 59.2                      | 8.1                       |                        | 11.7    |                           | 6.4                | 2.8                                  | 0.6                  | 19.9                                                    |                                                                                          |
|                                       | Mental                                  | 45.9                      | 9.3                       |                        | 7.3     |                           | 7.7                | 10.6                                 | 2.6                  | 22.2                                                    |                                                                                          |
|                                       | Sexual                                  | 85.4                      | 0.7                       |                        | 0.7     |                           | 0.7                |                                      | 1.5                  | 8.7                                                     |                                                                                          |
| Ahmed and Elmari (2005) <sup>26</sup> | Control, threat or physical             |                           |                           | 25.6                   |         |                           |                    |                                      |                      |                                                         |                                                                                          |
| Al-Shdayfat (2017a) <sup>34</sup>     | Emotional                               | 21.4                      | 19.8                      |                        | 13      |                           |                    |                                      |                      | Other family member 12                                  |                                                                                          |
| Al-Shdayfat (2017b) <sup>35</sup>     | Physical                                | 38.6                      |                           |                        | 10      |                           | 14                 |                                      |                      |                                                         |                                                                                          |
| Barnawi (2017) <sup>42</sup>          | All types                               | 81.2                      |                           |                        |         |                           | Wife's family 11.1 |                                      | Husband's family 6.9 | Other wife 4.9                                          |                                                                                          |
| Clark et al (2009b) <sup>46</sup>     | Physical during pregnancy               | 83.3                      | 8.3                       |                        |         |                           | Natal family 5     |                                      | Husband's family 1.7 | Someone else 1.7                                        |                                                                                          |
| Clark et al (2010) <sup>47</sup>      | Physical and sexual                     | -                         | -                         | 100                    | 1       | 1                         | 0                  | 30                                   | 9                    | Sister-in-law 27<br>Brother-in-law 17<br>Other-in-law 8 | Percentages relate to violence experienced by family perpetrators, not including husband |
| Haddad et al (2011) <sup>51</sup>     | Emotional                               | Husband and ex-husband 71 |                           |                        | 30      |                           |                    |                                      |                      |                                                         |                                                                                          |
| Oweis et al (2010) <sup>59</sup>      | Physical<br>Emotional<br>Verbal         |                           |                           | 1.9<br>11.1<br>13.9    |         |                           |                    | Most perpetrators were mother-in-law |                      |                                                         | Prevalence of violence by family member experienced amongst all survey respondents       |
| Spencer et al (2015) <sup>60</sup>    | Physical during pregnancy               | 73                        |                           | 45                     |         |                           |                    |                                      |                      |                                                         |                                                                                          |
| Usta et al (2007) <sup>62</sup>       | Verbal, emotional, physical or economic | 65                        | More than one offender 13 |                        |         | Mother or mother-in-law 8 |                    | Mother or mother-in-law 8            |                      | Own parents/ male family 18                             |                                                                                          |

Note: Unless otherwise specified, percentages relate to the percentage of abused women experiencing domestic violence committed by different perpetrators (husband or other family members)
