# Supplementary material for: Prevalence and health outcomes of domestic violence amongst clinical populations in Arab countries: a systematic review and meta-analysis
Source: PubMed Central journal article supplement (PMC6421940; doi:10.1186/s12889-019-6619-2), 2019-03-18

## Additional file 4 – forest plots for additional analyses

### 12-month physical IPV:

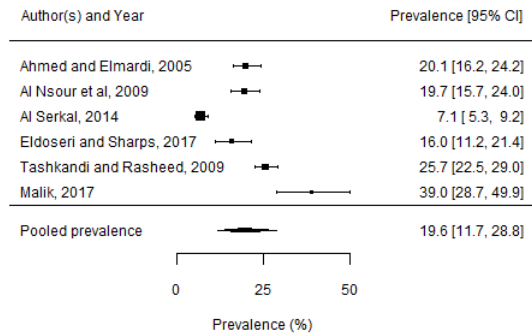

### 12-month emotional/psychological IPV:

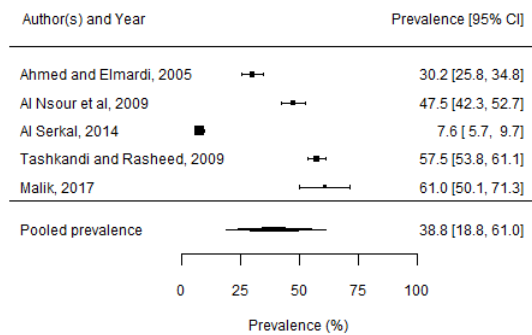

### Lifetime physical DV:

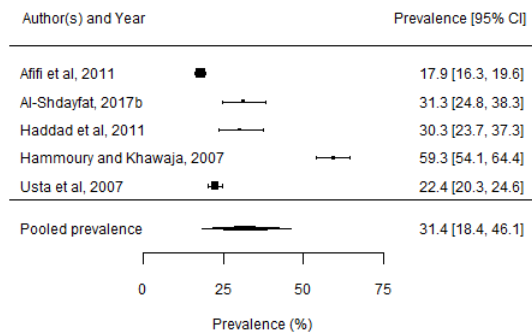

### Lifetime economic IPV:

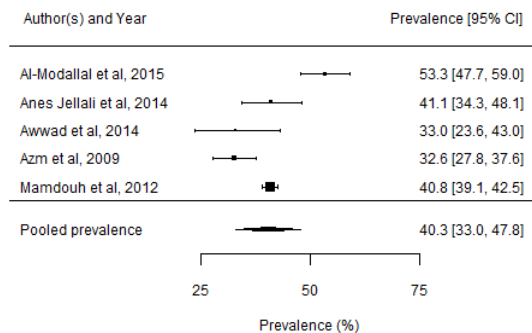

Supplement: 12889_2019_6619_MOESM4_ESM.pdf [file 12889_2019_6619_MOESM4_ESM.pdf]
