# Supplementary material for: Prevalence and health outcomes of domestic violence amongst clinical populations in Arab countries: a systematic review and meta-analysis
Source: PubMed Central journal article supplement (PMC6421940; doi:10.1186/s12889-019-6619-2), 2019-03-18
Supplement: 12889_2019_6619_MOESM5_ESM.pdf [file 12889_2019_6619_MOESM5_ESM.pdf]

## Additional file 5: Health outcomes as presented by primary studies

Results are presented in the table below for health conditions where data was available from at least 3 studies. Reported results are rounded to 1 decimal point or 2 sf.

### MENTAL HEALTH

#### Depression

| Paper                                      | Perp | Timescale     | Outcomes                               | Diagnostic method/tool                                                                          | Violence type                                               | Statistics (significant in bold)<br>OR, p value, other                                            |
|--------------------------------------------|------|---------------|----------------------------------------|-------------------------------------------------------------------------------------------------|-------------------------------------------------------------|---------------------------------------------------------------------------------------------------|
| Abdelhai and Mosleh (2015) <sup>23</sup> # | IPV  | Lifetime      | Depression (only without anxiety)      | HADS                                                                                            | Any                                                         | <b>OR 3.1 (1.1-8.3), p 0.03</b>                                                                   |
| Al-Shdayfat (2017a) <sup>34</sup>          | IPV  | 12m/lifetime? | Depression                             | Not documented                                                                                  | Emotional                                                   | <b>X<sup>2</sup>22.2, p 0.001</b>                                                                 |
| Al-Shdayfat (2017b) <sup>35</sup>          | DV   | Lifetime?     | Depression                             | Not documented                                                                                  | Physical                                                    | <b>X<sup>2</sup>4.5, p value 0.034</b>                                                            |
| Anes Jellali et al (2014) <sup>37</sup> #  | IPV  | Lifetime      | Depression                             | HADS score 8                                                                                    | Any                                                         | <b>OR 3.5 (1.3-9.7), p 0.012</b>                                                                  |
| Bakr and Ismail (2005) <sup>41</sup>       | IPV  | Lifetime      | Depression                             | Participant reported                                                                            | Control                                                     | <b>p &lt;0.05</b>                                                                                 |
| Boufettal et al (2012) <sup>43</sup> #     | IPV  | Pregnancy     | Depression                             | Not documented                                                                                  | Physical and/or sexual                                      | <b>p &lt; 0.0005</b>                                                                              |
| Eldoseri et al (2014) <sup>49</sup> #      | IPV  | Lifetime      | Antidepressant use in the last 4 weeks | Participant reported. WHO Violence against Women questionnaire (version 10.0) – adapted version | Physical                                                    | <b>Reported: OR 17.4 (2-152)<br/>Calculated: OR 12.4 (1.5-99.7)<br/>p= 0.01</b>                   |
| Haddad et al (2011) <sup>51</sup>          | DV   | Lifetime      | Depression                             | 'depression feelings' participant reported                                                      | Any: physical/sex/emot #<br>Physical<br>Sexual<br>Emotional | <b>r= 0.42, p &lt;0.001<br/>r= 0.36, p&lt;0.001<br/>r=0.16, p&lt;0.001<br/>r=0.41, p&lt;0.001</b> |

# Included in meta-analysis

#### Suicidal thoughts

| Paper                                | Perp | Timescale | Outcomes          | Diagnostic method/tool                                                                          | Violence type                                      | Statistics (significant in bold)<br>OR, p value, other                                                                          |
|--------------------------------------|------|-----------|-------------------|-------------------------------------------------------------------------------------------------|----------------------------------------------------|---------------------------------------------------------------------------------------------------------------------------------|
| Al-Modallal (2012) <sup>27</sup>     | IPV  | 12m       | Suicidal thoughts | Participant reported                                                                            | Any                                                | Crude OR 11.94 (4.5-31.6)<br><b>Adjusted OR 0.04 (0.009-0.15)</b>                                                               |
| Al-Serkal et al (2014) <sup>33</sup> | IPV  | Lifetime  | Suicidal thoughts | Not documented                                                                                  | Physical ONLY<br>Sexual ONLY<br>Psychological ONLY | <b>OR 5.1 (3.2-8.1), p=0.001<br/>OR 4.7 (2.9-7.5), p=0.001<br/>OR 5.8 (3.3-10.2), p=0.001</b><br>[stepwise logistic regression] |
| Eldoseri et al (2014) <sup>49</sup>  | IPV  | Lifetime  | Suicidal thoughts | Participant reported. WHO Violence against Women questionnaire (version 10.0) – adapted version | Physical                                           | <b>OR 6.6 (2.4-17.9)<br/>p&lt;0.001</b>                                                                                         |

|                                 |    |          |                   |                      |     |                       |
|---------------------------------|----|----------|-------------------|----------------------|-----|-----------------------|
| Usta et al (2007) <sup>62</sup> | DV | Lifetime | Suicidal thoughts | Participant reported | Any | <b>ANOVA, p=0.000</b> |
|---------------------------------|----|----------|-------------------|----------------------|-----|-----------------------|

### Suicide attempts

| Paper                                | Perp | Timescale | Outcomes         | Diagnostic method/tool                                                                          | Violence type                                      | Statistics (significant in bold)<br>OR, p value, other                                                                                       |
|--------------------------------------|------|-----------|------------------|-------------------------------------------------------------------------------------------------|----------------------------------------------------|----------------------------------------------------------------------------------------------------------------------------------------------|
| Al-Modallal (2012) <sup>27</sup>     | IPV  | 12m       | Suicide attempts | Participant reported                                                                            | Any                                                | Crude OR 9.1 (2.6-31.5)<br><b>Adjusted OR 0.02 (0.002-0.19)</b>                                                                              |
| Al-Serkal et al (2014) <sup>33</sup> | IPV  | Lifetime  | Suicide attempts | Not documented                                                                                  | Physical ONLY<br>Sexual ONLY<br>Psychological ONLY | <b>OR 8.8 (4.7-16.3), p=0.001</b><br><b>OR 5.2 (2.8-9.4), p=0.001</b><br><b>OR 5.1 (2.5-10.3), p=0.001</b><br>[stepwise logistic regression] |
| Boufettal et al (2012) <sup>43</sup> | IPV  | Pregnancy | Suicide attempts | Not documented                                                                                  | Physical and/or sexual                             | <b>p&lt;0.002</b>                                                                                                                            |
| Eldoseri et al (2014) <sup>49</sup>  | IPV  | Lifetime  | Suicide attempts | Participant reported. WHO Violence against Women questionnaire (version 10.0) – adapted version | Physical                                           | OR 4 (1-16.1)<br>p=0.06                                                                                                                      |

### Sleep

| Paper                                  | Perp | Timescale | Outcomes                                               | Diagnostic method/tool                                                                          | Violence type                  | Statistics (significant in bold)<br>OR, p value, other                                                           |
|----------------------------------------|------|-----------|--------------------------------------------------------|-------------------------------------------------------------------------------------------------|--------------------------------|------------------------------------------------------------------------------------------------------------------|
| Al-Modallal (2012) <sup>27</sup> #     | IPV  | 12m       | Sleep                                                  | Epworth Sleepiness Scale                                                                        | Any                            | Crude OR 1.1 (0.7-1.8)<br>Adjusted OR 0.64 (0.4-1.1)<br>p=0.72                                                   |
| Al-Shdayfat (2017a) <sup>34</sup>      | DV   | Lifetime  | Insomnia                                               | Participant reported                                                                            | Psych                          | <b>p=0.001</b>                                                                                                   |
| Al-Shdayfat (2017b) <sup>35</sup>      | DV   | Lifetime  | Insomnia                                               | Participant reported                                                                            | Physical                       | p= non-significant                                                                                               |
| Bakr and Ismail (2005) <sup>41</sup> # | IPV  | Lifetime  | Insomnia                                               | Participant reported                                                                            | Control                        | <b>p&lt;0.05</b>                                                                                                 |
| Boufettal et al (2012) <sup>43</sup> # | IPV  | Pregnancy | Sleep problems                                         | Not documented                                                                                  | Any: physical or sexual        | <b>p&lt;0.0005</b>                                                                                               |
| Eldoseri et al (2014) <sup>49</sup> #  | IPV  | Lifetime  | Taken sleep or relaxing medication in the last 4 weeks | Participant reported. WHO Violence against Women questionnaire (version 10.0) – adapted version | Physical                       | Reported: OR 2.1 (0.7-6.6)<br>Calculated: OR 1.7 (0.5-5.2)<br>p=0.2                                              |
| Haddad et al (2011) <sup>51</sup>      | DV   | Lifetime  | Insomnia                                               | Not documented                                                                                  | Any #<br>Physical<br>Emotional | <b>r=0.43, p&lt;0.001</b><br><b>r=0.37, p&lt;0.001</b><br><b>r=0.45, p&lt;0.001</b><br>[correlation coefficient] |
| Usta et al (2007) <sup>62</sup> #      | DV   | Lifetime  | Insomnia                                               | Participant reported                                                                            | Any                            | <b>ANOVA, p=0.000</b>                                                                                            |

# Included in meta-analysis

## Memory

| Paper                                | Perp | Timescale | Outcomes                                                                  | Diagnostic method/tool                                                                          | Violence type | Statistics (significant in bold)<br>OR, p value, other |
|--------------------------------------|------|-----------|---------------------------------------------------------------------------|-------------------------------------------------------------------------------------------------|---------------|--------------------------------------------------------|
| Al-Serkal et al (2014) <sup>33</sup> | IPV  | Lifetime  | Some/many or extreme memory or concentration problems                     | Not documented                                                                                  | Physical ONLY | <b>OR 5.2 (3.3-8.8)</b>                                |
| Eldoseri et al (2014) <sup>49</sup>  | IPV  | Lifetime  | Some/many or extreme memory or concentration problems in the last 4 weeks | Participant reported. WHO Violence against Women questionnaire (version 10.0) – adapted version | Physical      | OR 1.8 (0.9-3.2)<br>p=0.07                             |
| Usta et al (2007) <sup>62</sup>      | DV   | Lifetime  | Forgetfulness                                                             | Participant reported                                                                            | Any           | <b>p=0.000 (ANOVA)</b>                                 |

**Other mental problems with significant associations found by studies:** anxiety,<sup>37</sup> anxiety and depression,<sup>23,37</sup> postnatal depression,<sup>40</sup> stress,<sup>25,59</sup> distress/anguish.<sup>33,51</sup>

**Other mental health problems with no evidence of significant associations found by studies:** anxiety,<sup>23</sup> postnatal depression.<sup>40</sup>

## REPRODUCTIVE HEALTH

### Vaginal bleeding

| Paper                                | Perp | Timescale | Outcomes                 | Diagnostic method/tool | Violence type | Statistics (significant in bold)<br>OR, p value, other |
|--------------------------------------|------|-----------|--------------------------|------------------------|---------------|--------------------------------------------------------|
| Afifi et al (2011) <sup>25</sup>     | DV   | Lifetime  | Vaginal bleeding last 4w | Participant reported   | Any           | <b>OR 1.8 (1.3-2.5)</b><br><b>p=0.000</b>              |
| Bakr and Ismail (2005) <sup>41</sup> | IPV  | Lifetime  | Irregular period         | ?                      | Control       | Non-significant                                        |
| Usta et al (2007) <sup>62</sup>      | DV   | Lifetime  | Menstrual irregularities | Participant reported   | Any           | <b>p=0.000 (ANOVA)</b>                                 |

### Unplanned pregnancy

| Paper                          | Perp | Timescale | Outcomes            | Diagnostic method/tool | Violence type                                | Statistics (significant in bold)<br>OR, p value, other  |
|--------------------------------|------|-----------|---------------------|------------------------|----------------------------------------------|---------------------------------------------------------|
| Azm et al (2009) <sup>40</sup> | IPV  | Lifetime  | Unplanned pregnancy | Participant reported   | Any<br>Physical<br>Sexual<br>Emotional/psych | p= 0.095<br>p=0.032<br><b>p=0.008</b><br><b>p=0.007</b> |

|                                           |     |                  |                     |                      |                            |                                           |
|-------------------------------------------|-----|------------------|---------------------|----------------------|----------------------------|-------------------------------------------|
| Hammoury and Khawaja (2007) <sup>52</sup> | DV  | During pregnancy | Undesired pregnancy | Participant reported | Any: emotional or physical | OR 1.6 (0.66-3.8)                         |
| Ibrahim et al (2015) <sup>54</sup>        | IPV | Pregnancy        | Unwanted pregnancy  | Not documented       | Any                        | <b>OR 6.4 (4.9-8.4)</b>                   |
| Khawaja and Hammoury (2008) <sup>55</sup> | IPV | 12m              | Undesired pregnancy | Not documented       | Sexual                     | AOR 1.23 (0.72-2.1)                       |
| Oweis et al (2010) <sup>59</sup>          | IPV | Pregnancy        | Unplanned pregnancy | Participant reported | Any                        | <b>OR 2.5 (1.4-4.4)</b><br><b>p= 0.00</b> |

### Abortion

| Paper                                   | Perp | Timescale                       | Outcomes                        | Diagnostic method/tool | Violence type                                          | Statistics (significant in bold)<br>OR, p value, other                                                  |
|-----------------------------------------|------|---------------------------------|---------------------------------|------------------------|--------------------------------------------------------|---------------------------------------------------------------------------------------------------------|
| Afifi et al (2011) <sup>25</sup> #      | DV   | Lifetime                        | Abortion                        | Participant reported   | Any                                                    | <b>OR 1.3 (1.1-1.6)</b><br><b>p=0.006</b>                                                               |
| Anes Jellali et al (2015) <sup>38</sup> |      | Lifetime                        | Induced abortion                | Not documented         | Any<br>Physical<br>Sexual<br>Psychological<br>Economic | <b>p&lt;0.0001</b><br><b>p&lt;0.001</b><br><b>p&lt;0.03</b><br><b>p&lt;0.0001</b><br><b>p&lt;0.0001</b> |
| Azm et al (2009) <sup>40</sup> #        | IPV  | Lifetime                        | No vs one vs multiple abortions | Participant reported   | Any<br>Physical<br>Sexual<br>Psychological             | <b>p=0.003</b><br><b>p=0.002</b><br><b>p=0.003</b><br>p=0.245                                           |
| Boufettal et al (2012) <sup>43</sup> #  | IPV  | Pregnancy                       | Abortion                        | Not documented         | Any: physical or sexual                                | <b>p&lt;0.0005</b>                                                                                      |
| Ibrahim et al (2015) <sup>54</sup> #    | IPV  | Pregnancy                       | Complete abortion               | Medical records        | Any<br>Physical                                        | <b>RR 5.4 (2.4-12.3)</b><br><b>RR 10.9 (5.6-21.5)</b>                                                   |
| Spencer et al (2015) <sup>60</sup> #    | DV   | Since coming to Jordan/ Lebanon | Abortion                        | Not documented         | Any                                                    | Absolute numbers and % only reported by paper.<br>Calculated: OR 0.94 (0.17-6.3)                        |
| Usta et al (2007) <sup>62</sup> #       | DV   | Lifetime                        | Abortion                        | Participant reported   | Any                                                    | <b>p=0.003 (ANOVA)</b>                                                                                  |

# Included in meta-analysis

### Premature labour

| Paper | Perp | Timescale | Outcomes | Diagnostic method/tool | Violence type | Statistics (significant in bold)<br>OR, p value, other |
|-------|------|-----------|----------|------------------------|---------------|--------------------------------------------------------|
|-------|------|-----------|----------|------------------------|---------------|--------------------------------------------------------|

|                                      |     |           |                   |                      |                           |                                                                                       |
|--------------------------------------|-----|-----------|-------------------|----------------------|---------------------------|---------------------------------------------------------------------------------------|
| Azm et al (2009) <sup>40</sup>       | IPV | Lifetime  | Premature and LBW | Participant reported | Any<br>Physical<br>Sexual | <b>p=0.0004</b> (for all postnatal complications)<br><b>p=0.006</b><br><b>p=0.004</b> |
| Abujilban et al (2015) <sup>24</sup> | IPV | Pregnancy | Preterm birth     | Medical records      | Physical                  | p=0.8                                                                                 |
| Ibrahim et al (2015) <sup>54</sup>   | IPV | Pregnancy | Preterm labour    | Medical records      | Any<br>Physical           | <b>RR 2.4 (1.5-3.8)</b><br><b>RR 5.7 (37.-8.8)</b>                                    |

**Other reproductive health problems with significant associations found by studies:** vaginal discharge,<sup>33,62</sup> not using contraception,<sup>40,44</sup> stillbirth,<sup>54</sup> postpartum haemorrhage,<sup>40</sup> low birthweight,<sup>24,54</sup> neonatal death,<sup>54</sup> threatened abortion,<sup>54</sup> placental separation,<sup>43</sup> PROM,<sup>54</sup> fetal distress.<sup>54</sup>

**Other reproductive health problems with no evidence of significant associations found by studies:** not using contraception,<sup>40</sup> stillbirth,<sup>43</sup> antepartum haemorrhage,<sup>54</sup> postpartum haemorrhage,<sup>40,54</sup> PROM,<sup>43</sup> retroplacental haematoma,<sup>43</sup> assisted newborn ventilation,<sup>24</sup> caesarean delivery.<sup>54</sup>

## MEDICAL

### Dizziness

| Paper                                | Perp | Timescale | Outcomes                      | Diagnostic method/tool | Violence type                                      | Statistics (significant in bold)<br>OR, p value, other |
|--------------------------------------|------|-----------|-------------------------------|------------------------|----------------------------------------------------|--------------------------------------------------------|
| Afifi et al (2011) <sup>25</sup>     | DV   | Lifetime  | Dizziness in last 4 weeks     | Participant reported   | Any                                                | <b>OR 1.9 (1.6-2.3)</b><br><b>p=0.000</b>              |
| Al-Modallal (2016) <sup>30</sup>     | IPV  | 12m       | Recurrent dizziness last year | Participant reported   | Physical ONLY<br>Sexual ONLY<br>Psychological ONLY | <b>P&lt;0.01</b><br><b>P&lt;0.05</b><br><b>P=0.009</b> |
| Al-Serkal et al (2014) <sup>33</sup> | IPV  | Lifetime  | Dizziness                     | Not documented         | Physical ONLY                                      | <b>OR 3.1 (2.1-4.5)</b>                                |
| Usta et al (2007) <sup>62</sup>      | DV   | Lifetime  | Dizziness                     | Participant reported   | Any                                                | <b>p=0.000 (ANOVA)</b>                                 |

### Pain

| Paper                              | Perp | Timescale | Outcomes                         | Diagnostic method/tool | Violence type | Statistics (significant in bold)<br>OR, p value, other                                                                                                     |
|------------------------------------|------|-----------|----------------------------------|------------------------|---------------|------------------------------------------------------------------------------------------------------------------------------------------------------------|
| Afifi et al (2011) <sup>25</sup> # | DV   | Lifetime  | Pain in last 4 weeks by severity | Participant reported   | Any           | <b>Mild OR 1.8 (1.4-2.3)</b><br><b>Moderate OR 3.9 (3-5.1)</b><br><b>Severe OR 6.3 (4.0-9.7) #</b><br><b>Very severe OR 8.9 (3.1-25)</b><br><b>p=0.000</b> |

|                                        |     |          |                                                   |                                                                                                 |                                                                                                                                                  |                                                                                                                                                                                 |
|----------------------------------------|-----|----------|---------------------------------------------------|-------------------------------------------------------------------------------------------------|--------------------------------------------------------------------------------------------------------------------------------------------------|---------------------------------------------------------------------------------------------------------------------------------------------------------------------------------|
| Al-Modallal (2016) <sup>30</sup> #     | IPV | 12m      | Back pain #<br><br>Joint pain<br><br>Fibromyalgia | Participant reported                                                                            | Physical ONLY #<br>Sexual ONLY<br>Psych ONLY<br><br>Physical ONLY<br>Sexual ONLY<br>Psych ONLY<br><br>Physical ONLY<br>Sexual ONLY<br>Psych ONLY | Non-significant<br>Non-significant<br><b>p&lt;0.01</b><br><br>Non-significant<br>Non-significant<br><b>p=0.004</b><br><br>Non-significant<br><b>p&lt;0.05</b><br><b>p=0.007</b> |
| Al-Serkal et al (2014) <sup>33</sup>   | IPV | Lifetime | Mod/severe/ extreme pain                          | Not documented                                                                                  | Physical AND sexual #<br>Physical ONLY                                                                                                           | <b>OR 3.5 (1.9-6.2)</b><br><b>OR 3.3 (1.9-5.9)</b>                                                                                                                              |
| Bakr and Ismail (2005) <sup>41</sup> # | IPV | Lifetime | Bone ache                                         | Participant reported                                                                            | Control                                                                                                                                          | <b>p&lt;0.5</b>                                                                                                                                                                 |
| Eldoseri et al (2014) <sup>49</sup> #  | IPV | Lifetime | Pain or discomfort last 4 weeks                   | Participant reported. WHO Violence against Women questionnaire (version 10.0) – adapted version | Physical                                                                                                                                         | <b>OR 2.2 (1.2-3.9)</b><br><b>p=0.007</b>                                                                                                                                       |
| Usta et al (2007) <sup>62</sup> #      | DV  | Lifetime | Backache<br>Arthralgia<br>Abdo pain               | Participant reported                                                                            | Any                                                                                                                                              | <b>p=0.000 (ANOVA)</b><br><b>p=0.000 (ANOVA)</b><br><b>p=0.000 (ANOVA)</b>                                                                                                      |

# Included in meta-analysis

### Hypertension

| Paper                                  | Perp | Timescale | Outcomes     | Diagnostic method/tool | Violence type                                        | Statistics (significant in bold)<br>OR, p value, other |
|----------------------------------------|------|-----------|--------------|------------------------|------------------------------------------------------|--------------------------------------------------------|
| Afifi et al (2011) <sup>25</sup> #     | DV   | Lifetime  | Hypertension | BP measurement         | Any                                                  | OR 1.23 (0.92-1.7)<br>p=0.144                          |
| Al-Modallal (2016) <sup>30</sup> #     | IPV  | 12m       | Hypertension | Participant reported   | Physical ONLY #<br>Sexual ONLY<br>Psychological ONLY | Non-significant<br><b>p&lt;0.05</b><br>Non-significant |
| Bakr and Ismail (2005) <sup>41</sup> # | IPV  | Lifetime  | Hypertension | Participant reported   | Control                                              | Non-significant                                        |
| Barnawi (2017) <sup>42</sup> #         | DV   | 12m       | Hypertension | Not documented         | Any                                                  | <b>p=0.01</b>                                          |
| Usta et al (2007) <sup>62</sup> #      | DV   | Lifetime  | Hypertension | Participant reported   | Any                                                  | p=0.006 (ANOVA)                                        |

# Included in meta-analysis

### Diabetes

| Paper                                | Perp | Timescale | Outcomes | Diagnostic method/tool | Violence type                                      | Statistics (significant in bold)<br>OR, p value, other |
|--------------------------------------|------|-----------|----------|------------------------|----------------------------------------------------|--------------------------------------------------------|
| Al-Modallal (2016) <sup>30</sup>     | IPV  | 12m       | Diabetes | Participant reported   | Physical ONLY<br>Sexual ONLY<br>Psychological ONLY | Non-significant<br>Non-significant<br>Non-significant  |
| Bakr and Ismail (2005) <sup>41</sup> | IPV  | Lifetime  | Diabetes | Participant reported   | Control                                            | Non-significant                                        |
| Barnawi (2017) <sup>42</sup>         | DV   | 12m       | Diabetes | Not documented         | Any                                                | <b>p=0.027</b>                                         |

### General health

| Paper                                | Perp | Timescale | Outcomes                               | Diagnostic method/tool                                                                          | Violence type                        | Statistics (significant in bold)<br>OR, p value, other                                                                              |
|--------------------------------------|------|-----------|----------------------------------------|-------------------------------------------------------------------------------------------------|--------------------------------------|-------------------------------------------------------------------------------------------------------------------------------------|
| Afifi et al (2011) <sup>25</sup>     | DV   | Lifetime  | Perceived general health               | Participant reported                                                                            | Any                                  | <b>Reasonable OR 0.36 (0.21-0.63)</b><br><b>Good OR 0.23 (0.13-0.39)</b><br><b>Excellent OR 0.15 (0.084-0.26)</b><br><b>p=0.000</b> |
| Al-Modallal (2016) <sup>30</sup>     | IPV  | 12m       | General health                         | Participant reported                                                                            | Physical ONLY                        | Non-significant                                                                                                                     |
| Al-Serkal et al (2014) <sup>33</sup> | IPV  | Lifetime  | Self reported poor or very poor health | Not documented                                                                                  | Physical AND sexual<br>Physical ONLY | <b>OR 7.1 (2.3-21.9)</b><br><b>OR 6.4 (1.9-21.2)</b>                                                                                |
| Eldoseri et al (2014) <sup>49</sup>  | IPV  | Lifetime  | Good/ excellent health status          | Participant reported. WHO Violence against Women questionnaire (version 10.0) – adapted version | Physical                             | <b>OR 0.5 (0.3-0.9)</b><br><b>p=0.02</b>                                                                                            |

### Daily activities

| Paper                                | Perp | Timescale | Outcomes                                                 | Diagnostic method/tool | Violence type                        | Statistics (significant in bold)<br>OR, p value, other                                                                                                     |
|--------------------------------------|------|-----------|----------------------------------------------------------|------------------------|--------------------------------------|------------------------------------------------------------------------------------------------------------------------------------------------------------|
| Afifi et al (2011) <sup>25</sup>     | DV   | Lifetime  | Problems in daily activities in the last 4 weeks         | Participant reported   | Any                                  | <b>Few OR 1.8 (1.4-2.2)</b><br><b>Some OR 2.6 (2.0-3.3)</b><br><b>Many OR 3.7 (2.5-5.6)</b><br><b>Unable to do it OR 4.1 (0.98-17.4)</b><br><b>p=0.000</b> |
| Al-Serkal et al (2014) <sup>33</sup> | IPV  | Lifetime  | Some/many problems or unable to perform usual activities | Not documented         | Physical AND sexual<br>Physical ONLY | <b>OR 5.4 (2.8-10.5)</b><br><b>OR 4.3 (2.1-8.7)</b>                                                                                                        |

|                                     |     |          |                                                   |                                                                                                 |          |                           |
|-------------------------------------|-----|----------|---------------------------------------------------|-------------------------------------------------------------------------------------------------|----------|---------------------------|
| Eldoseri et al (2014) <sup>49</sup> | IPV | Lifetime | Problems with daily functions in the last 4 weeks | Participant reported. WHO Violence against Women questionnaire (version 10.0) – adapted version | Physical | OR 1.0 (0.5-2.0)<br>p=0.9 |
|-------------------------------------|-----|----------|---------------------------------------------------|-------------------------------------------------------------------------------------------------|----------|---------------------------|

### Mobility

| Paper                                | Perp | Timescale | Outcomes                                   | Diagnostic method/tool                                                                          | Violence type                        | Statistics (significant in bold)<br>OR, p value, other                                                                                   |
|--------------------------------------|------|-----------|--------------------------------------------|-------------------------------------------------------------------------------------------------|--------------------------------------|------------------------------------------------------------------------------------------------------------------------------------------|
| Afifi et al (2011) <sup>25</sup>     | DV   | Lifetime  | Problems in movement last 4 weeks          | Participant reported                                                                            | Any                                  | Few OR 1.3 (1.0-1.6)<br>Some OR <b>2.8 (2.1-3.6)</b><br>Many OR <b>3.0 (1.7-5.2)</b><br>Unable to move OR 1 (0.1-11.1)<br><b>p=0.000</b> |
| Al-Serkal et al (2014) <sup>33</sup> | IPV  | Lifetime  | Many problems walking / unable to walk     | Not documented                                                                                  | Physical AND sexual<br>Physical ONLY | <b>OR 7 (2.5-19.7)</b><br><b>OR 3.7 (1.2-11)</b>                                                                                         |
| Eldoseri et al (2014) <sup>49</sup>  | IPV  | Lifetime  | Problems with movement in the last 4 weeks | Participant reported. WHO Violence against Women questionnaire (version 10.0) – adapted version | Physical                             | OR 1.4 (0.7-2.6)<br>p=0.3                                                                                                                |

### Medication use

| Paper                               | Perp | Timescale | Outcomes                                  | Diagnostic method/tool                                                                          | Violence type | Statistics (significant in bold)<br>OR, p value, other |
|-------------------------------------|------|-----------|-------------------------------------------|-------------------------------------------------------------------------------------------------|---------------|--------------------------------------------------------|
| Afifi et al (2011) <sup>25</sup>    | DV   | Lifetime  | Took drugs in the last 4 weeks            | Participant reported                                                                            | Any           | <b>OR 2.4 (2.0-2.9)</b><br><b>p=0.000</b>              |
| Al-Modallal (2012) <sup>27</sup>    | IPV  | 12m       | Use of prescribed tranquilizers           | Participant reported                                                                            | Any           | <b>aOR 0.014 (0.00-0.86)</b>                           |
| Eldoseri et al (2014) <sup>49</sup> | IPV  | Lifetime  | Taken pain medication in the last 4 weeks | Participant reported. WHO Violence against Women questionnaire (version 10.0) – adapted version | Physical      | OR 1.09 (0.6-2.1)<br>p=0.8                             |

**Other general health problems with significant associations found by studies:** headache,<sup>62</sup> heart problems,<sup>30</sup> movement problems,<sup>25</sup> problems walking,<sup>33</sup> epilepsy,<sup>42</sup> chronic disease,<sup>42</sup> gastrointestinal problems,<sup>30,41,62</sup> respiratory problems,<sup>30,62</sup> urinary problems,<sup>30,62</sup> liver problems,<sup>30</sup> smoking/addiction/alcohol.<sup>54</sup>

**Other general health problems with no evidence of significant associations found by studies:** headache,<sup>41</sup> arthritis,<sup>30</sup> heart problems,<sup>30</sup> movement,<sup>49</sup> gastrointestinal,<sup>30</sup> respiratory,<sup>30</sup> urinary,<sup>30</sup> kidney problems,<sup>30</sup> smoking.<sup>27</sup>
